# Supplementary material for: Occurrence of Selected Emerging Contaminants in Southern Europe WWTPs: Comparison of Simulations and Real Data
Source: MDPI journal article supplement (doi:10.3390/pr10122491), 2022-11-23
Supplement: s1 [file s1]

Supplementary Materials

# Occurrence of selected emerging contaminants in Southern Europe WWTPs: comparison of simulations and real data

Daniel Sol <sup>1</sup>, Andrea Menéndez-Manjón <sup>1</sup>, Paula Arias-García <sup>1</sup>, Amanda Laca <sup>1</sup>, Adriana Laca <sup>1,\*</sup>, Amador Rancaño <sup>2</sup> and Mario Díaz <sup>1</sup>

<sup>1</sup> Department of Chemical and Environmental Engineering, University of Oviedo, C/Julián Clavería s/n, 33006 Oviedo, Spain

<sup>2</sup> ACCIONA Agua S.A., 28108 Alcobendas, Spain

\* Correspondence: lacaadriana@uniovi.es (A.L.); Tel.: +34-985-10-29-74

**Table S1.** Physicochemical characteristics of selected emerging compounds analysed in the present work.

| Compound.             | Type    | Molecular weight (g/mol) | Solubility (mg/L) | Vapor pressure (Pa)    | K <sub>ow</sub> | pKa   | Henry coefficient (Pa·m <sup>3</sup> ·mol <sup>-1</sup> ) |
|-----------------------|---------|--------------------------|-------------------|------------------------|-----------------|-------|-----------------------------------------------------------|
| Ibuprofen             | Acid    | 206.28                   | 21                | 6.3·10 <sup>-3</sup>   | 9,332.54        | 4.52  | 0.015                                                     |
| Diclofenac            | Acid    | 296.1                    | 2.37              | 8.19·10 <sup>-6</sup>  | 32,359.37       | 4.15  | 4.79·10 <sup>-7</sup>                                     |
| Erythromycin          | Base    | 733.9                    | 2000              | 2.83·10 <sup>-23</sup> | 1,148.15        | 8.8   | -                                                         |
| Triclosan             | Neutral | 289.5                    | 10                | 6.13·10 <sup>-4</sup>  | 57,543.99       | 7.9   | 2.13·10 <sup>-3</sup>                                     |
| Imidacloprid          | Base    | 255.66                   | 610               | 4·10 <sup>-10</sup>    | 3.715           | 11.12 | 1.67·10 <sup>-10</sup>                                    |
| 17α-ethinylestra-diol | Base    | 296.4                    | 11.3              | 2.6·10 <sup>-7</sup>   | 4,677.35        | 10.33 | 8.05·10 <sup>-7</sup>                                     |

**Table S2.** Physicochemical and biological parameters provided by WWTP 1. BOD, biological oxygen demand; TTS, total suspended solids (INF: influent water after screening; TER: influent tertiary treatment); MLSSLM, mixed liquor suspended solids suspended within the mixed liquor.

| Months        | Treated flow (m <sup>3</sup> /day) | Average daily temperature (K) | pH  | BOD (mg/L) | TSS <sub>INF</sub> (mg/L) | TSS <sub>TER</sub> (mg/L) | MLSS (mg/L) |
|---------------|------------------------------------|-------------------------------|-----|------------|---------------------------|---------------------------|-------------|
| July '20      | 3059                               | 297.95                        | 7.2 | 565        | 399                       | 8                         | 2448        |
| August '20    | 2848                               | 297.45                        | 7.1 | 542        | 363                       | 9                         | 2730        |
| September '20 | 2652                               | 293.05                        | 7.1 | 539        | 517                       | 8                         | 2925        |
| October '20   | 2510                               | 288.85                        | 7.1 | 405        | 265                       | 5                         | 3404        |
| November '20  | 2515                               | 282.85                        | 7.0 | 781        | 704                       | 7                         | 3014        |
| December '20  | 2269                               | 280.05                        | 6.8 | 599        | 602                       | 6                         | 3899        |
| January '21   | 3015                               | 279.25                        | 7.0 | 838        | 798                       | 10                        | 3477        |
| February '21  | 2390                               | 280.25                        | 6.6 | 860        | 636                       | 5                         | 3338        |
| March '21     | 3000                               | 282.95                        | 6.8 | 871        | 661                       | 4                         | 2943        |

**Table S3.** Physicochemical and biological parameters provided by WWTP 2. BOD, biological oxygen demand; TTS, total suspended solids (INF: influent water after screening; TER: influent tertiary treatment); MLSS, mixed liquor suspended solids suspended within the mixed liquor.

| Months        | Treated flow (m <sup>3</sup> /day) | Average daily temperature (K) | pH  | BOD (mg/L) | TSS <sub>INF</sub> (mg/L) | TSS <sub>TER</sub> (mg/L) | MLSS (mg/L) |
|---------------|------------------------------------|-------------------------------|-----|------------|---------------------------|---------------------------|-------------|
| July '20      | 1706                               | 298.75                        | 7.8 | 428        | 385                       | 14                        | 2059        |
| August '20    | 1647                               | 299.15                        | 7.8 | 532        | 377                       | 9                         | 2187        |
| September '20 | 1704                               | 294.25                        | 7.7 | 410        | 346                       | 11                        | 2355        |
| October '20   | 1761                               | 289.35                        | 7.4 | 385        | 380                       | 15                        | 2384        |
| November '20  | 1944                               | 286.05                        | 7.5 | 404        | 291                       | 9                         | 2248        |
| December '20  | 1842                               | 282.75                        | 7.5 | 362        | 306                       | 9                         | 2870        |
| January '21   | 2368                               | 281.45                        | 7.5 | 403        | 283                       | 11                        | 3717        |
| February '21  | 1793                               | 284.55                        | 7.6 | 415        | 373                       | 10                        | 3349        |
| March '21     | 2123                               | 284.15                        | 7.6 | 449        | 339                       | 10                        | 2750        |

**Table S4.** Physicochemical and biological parameters provided by WWTP 3. BOD, biological oxygen demand; TTS, total suspended solids (INF: influent water after screening; TER: influent tertiary treatment); MLSS, mixed liquor suspended solids suspended within the mixed liquor.

| Months        | Treated flow (m <sup>3</sup> /day) | Average daily temperature (K) | pH  | BOD (mg/L) | TSS <sub>INF</sub> (mg/L) | TSS <sub>TER</sub> (mg/L) | MLSS (mg/L) |
|---------------|------------------------------------|-------------------------------|-----|------------|---------------------------|---------------------------|-------------|
| July '20      | 4981                               | 301.05                        | 7.6 | 388        | 328                       | 11                        | 1378        |
| August '20    | 4089                               | 301.75                        | 7.6 | 292        | 475                       | 16                        | 1013        |
| September '20 | 4803                               | 297.55                        | 7.3 | 433        | 391                       | 10                        | 1166        |
| October '20   | 4707                               | 292.15                        | 7.8 | 462        | 556                       | 7                         | 975         |
| November '20  | 4936                               | 289.35                        | 7.5 | 297        | 346                       | 6                         | 1174        |
| December '20  | 4672                               | 285.15                        | 7.4 | 470        | 410                       | 4                         | 996         |
| January '21   | 4374                               | 284.05                        | 7.5 | 547        | 406                       | 7                         | 1923        |
| February '21  | 4584                               | 287.25                        | 7.5 | 472        | 501                       | 7                         | 1366        |
| March '21     | 4510                               | 286.95                        | 7.5 | 465        | 392                       | 5                         | 1123        |

**Table S5.** Physicochemical and biological parameters provided by WWTP 4. BOD, biological oxygen demand; TTS, total suspended solids (INF: influent water after screening; TER: influent tertiary treatment); MLSS, mixed liquor suspended solids suspended within the mixed liquor.

| Months        | Treated flow (m <sup>3</sup> /day) | Average daily temperature (K) | pH   | BOD (mg/L) | TSS <sub>INF</sub> (mg/L) | TSS <sub>TER</sub> (mg/L) | MLSS (mg/L) |
|---------------|------------------------------------|-------------------------------|------|------------|---------------------------|---------------------------|-------------|
| July '20      | 3450                               | 297.75                        | 7.77 | 441        | 382                       | 7                         | 1047        |
| August '20    | 2239                               | 297.15                        | 7.8  | 529        | 506                       | 4                         | 1068        |
| September '20 | 2185                               | 292.65                        | 7.81 | 638        | 407                       | 9.3                       | 1020        |
| October '20   | 2087                               | 288.35                        | 7.86 | 439        | 454                       | 9                         | 1036        |
| November '20  | 1385                               | 282.25                        | 7.86 | 575        | 685                       | 16                        | 1668        |
| December '20  | 1714                               | 279.55                        | 8.02 | 575        | 505                       | 16                        | 1168        |
| January '21   | 1710                               | 278.75                        | 7.81 | 478        | 752                       | 19                        | 1421        |

|              |      |        |      |     |     |    |      |
|--------------|------|--------|------|-----|-----|----|------|
| February '21 | 1536 | 279.75 | 7.88 | 560 | 425 | 11 | 1439 |
| March '21    | 2128 | 282.45 | 7.88 | 530 | 635 | 10 | 1757 |

**Table S6.** Ibuprofen concentrations ( $\mu\text{g/L}$ ) and removal efficiencies (%) in influent and effluent in the four WWTPs analysed; n.d. is not detected.

| Months        | INFLUENT ( $\mu\text{g/L}$ ) |        |        |        | EFFLUENT ( $\mu\text{g/L}$ ) |        |        |        | Removal efficiency (%) |        |        |        |
|---------------|------------------------------|--------|--------|--------|------------------------------|--------|--------|--------|------------------------|--------|--------|--------|
|               | WWTP 1                       | WWTP 2 | WWTP 3 | WWTP 4 | WWTP 1                       | WWTP 2 | WWTP 3 | WWTP 4 | WWTP 1                 | WWTP 2 | WWTP 3 | WWTP 4 |
| July '20      | 2.92                         | 8.42   | 4.35   | 6.53   | 0.03                         | 0.04   | 0.09   | 0.84   | 99.0                   | 99.5   | 97.9   | 87.1   |
| August '20    | 1.70                         | 2.72   | 3.12   | 2.48   | 0.08                         | 0.01   | 0.04   | 0.07   | 95.3                   | 99.6   | 98.7   | 97.2   |
| September '20 | 1.70                         | 1.56   | 3.11   | 1.41   | 0.27                         | n. d.  | 0.03   | 0.10   | 84.1                   | -      | 99.0   | 92.9   |
| October '20   | 4.31                         | 59.00  | 31.80  | 51.20  | 0.01                         | 0.13   | 0.49   | 2.83   | 99.8                   | 99.8   | 98.5   | 94.5   |
| November '20  | 0.20                         | 5.20   | 7.21   | 11.70  | 0.04                         | 2.80   | 0.04   | 0.11   | 80.0                   | 46.2   | 99.4   | 99.1   |
| December '20  | 2.51                         | 8.20   | 5.93   | 3.06   | 0.04                         | 0.02   | 0.02   | 0.43   | 98.4                   | 99.8   | 99.7   | 85.9   |
| January '21   | 3.84                         | 8.65   | 7.33   | 9.57   | 0.10                         | 0.01   | 0.25   | 0.52   | 97.4                   | 99.9   | 96.6   | 94.6   |
| February '21  | 1.47                         | 3.69   | 3.23   | 3.69   | 0.01                         | 0.01   | 0.13   | 0.18   | 99.3                   | 99.7   | 96.0   | 95.1   |
| March '21     | 5.31                         | 11.50  | 19.70  | 8.53   | 0.12                         | 0.06   | 0.31   | 0.53   | 97.7                   | 99.5   | 98.4   | 93.8   |

**Table S7.** Diclofenac concentrations ( $\mu\text{g/L}$ ) and removal efficiencies (%) in influent and effluent in the four WWTPs analysed; n.d. is not detected.

| Months        | INFLUENT ( $\mu\text{g/L}$ ) |        |        |        | EFFLUENT ( $\mu\text{g/L}$ ) |        |        |        | Removal efficiency (%) |        |        |        |
|---------------|------------------------------|--------|--------|--------|------------------------------|--------|--------|--------|------------------------|--------|--------|--------|
|               | WWTP 1                       | WWTP 2 | WWTP 3 | WWTP 4 | WWTP 1                       | WWTP 2 | WWTP 3 | WWTP 4 | WWTP 1                 | WWTP 2 | WWTP 3 | WWTP 4 |
| July '20      | 0.68                         | 0.17   | 0.36   | 0.94   | 0.15                         | n. d.  | 0.26   | n. d.  | 77.9                   | -      | 27.8   | -      |
| August '20    | 1.49                         | 1.29   | 0.74   | 1.60   | 0.33                         | 0.17   | n. d.  | n. d.  | 77.9                   | 86.8   | -      | -      |
| September '20 | 0.13                         | 0.26   | 0.58   | 0.18   | n. d.                        | n. d.  | n. d.  | n. d.  | -                      | -      | -      | -      |
| October '20   | 0.51                         | 2.91   | 2.11   | 2.44   | n. d.                        | 1.32   | 0.95   | 3.66   | -                      | 54.6   | 55.0   | -      |
| November '20  | n. d.                        | n. d.  | n. d.  | n. d.  | n. d.                        | n. d.  | n. d.  | n. d.  | -                      | -      | -      | -      |
| December '20  | n. d.                        | n. d.  | n. d.  | n. d.  | n. d.                        | n. d.  | n. d.  | n. d.  | -                      | -      | -      | -      |
| January '21   | 0.84                         | 0.29   | 0.61   | 2.64   | 1.04                         | 0.41   | 1.15   | 2.01   | -                      | -      | -      | 23.9   |
| February '21  | n. d.                        | n. d.  | n. d.  | n. d.  | n. d.                        | n. d.  | n. d.  | n. d.  | -                      | -      | -      | -      |
| March '21     | n. d.                        | n. d.  | n. d.  | n. d.  | 0.24                         | n. d.  | n. d.  | n. d.  | -                      | -      | -      | -      |

**Table S8.** Erythromycin concentrations ( $\mu\text{g/L}$ ) and removal efficiencies (%) in influent and effluent in the four WWTPs analysed; n.d. is not detected.

| Months        | INFLUENT ( $\mu\text{g/L}$ ) |        |        |        | EFFLUENT ( $\mu\text{g/L}$ ) |        |        |        | Removal efficiency (%) |        |        |        |
|---------------|------------------------------|--------|--------|--------|------------------------------|--------|--------|--------|------------------------|--------|--------|--------|
|               | WWTP 1                       | WWTP 2 | WWTP 3 | WWTP 4 | WWTP 1                       | WWTP 2 | WWTP 3 | WWTP 4 | WWTP 1                 | WWTP 2 | WWTP 3 | WWTP 4 |
| July '20      | 4.08                         | 2.00   | n. d.  | 4.21   | n. d.                        | 1.43   | n. d.  | 1.13   | -                      | 28.5   | -      | 73.2   |
| August '20    | 22.90                        | 10.80  | 77.90  | 39.20  | 3.40                         | 45.8   | 8.89   | n. d.  | 85.2                   | -      | 88.6   | -      |
| September '20 | 65.60                        | 46.50  | 48.40  | 25.00  | 11.90                        | 12.10  | 4.60   | 5.85   | 81.9                   | 74.0   | 90.5   | 76.6   |
| October '20   | n. d.                        | 1.29   | 1.52   | 0.39   | n. d.                        | n. d.  | n. d.  | n. d.  | -                      | -      | -      | -      |
| November '20  | n. d.                        | n. d.  | 171.00 | 29.70  | n. d.                        | n. d.  | 25     | n. d.  | -                      | -      | 85.4   | -      |
| December '20  | n. d.                        | n. d.  | n. d.  | 7.66   | n. d.                        | n. d.  | n. d.  | n. d.  | -                      | -      | -      | -      |
| January '21   | n. d.                        | 0.95   | n. d.  | 0.61   | n. d.                        | n. d.  | 0.09   | n. d.  | -                      | -      | -      | -      |
| February '21  | 1.25                         | n. d.  | n. d.  | n. d.  | n. d.                        | n. d.  | n. d.  | n. d.  | -                      | -      | -      | -      |
| March '21     | 2.61                         | 1.84   | n. d.  | 0.67   | 0.84                         | 1.13   | 0.61   | n. d.  | 67.8                   | 38.6   | -      | -      |

**Table S9.** Triclosan concentrations ( $\mu\text{g/L}$ ) and removal efficiencies (%) in influent and effluent in the four WWTPs analysed; n.d. is not detected.

| Months        | INFLUENT ( $\mu\text{g/L}$ ) |        |        |        | EFFLUENT ( $\mu\text{g/L}$ ) |        |        |        | Removal efficiency (%) |        |        |        |
|---------------|------------------------------|--------|--------|--------|------------------------------|--------|--------|--------|------------------------|--------|--------|--------|
|               | WWTP 1                       | WWTP 2 | WWTP 3 | WWTP 4 | WWTP 1                       | WWTP 2 | WWTP 3 | WWTP 4 | WWTP 1                 | WWTP 2 | WWTP 3 | WWTP 4 |
| July '20      | 0.04                         | 0.03   | 0.01   | 0.01   | n. d.                        | 0.01   | n. d.  | 0.01   | -                      | 66.7   | -      | 0      |
| August '20    | 0.19                         | 0.20   | 0.20   | 0.21   | 0.18                         | 0.20   | 0.19   | 0.19   | 5.3                    | 0      | 5      | 9.5    |
| September '20 | 0.02                         | 0.04   | 0.04   | 0.01   | 0.01                         | 0.03   | 0.02   | 0.02   | 50                     | 25     | 50     | -      |
| October '20   | 0.01                         | 0.01   | 0.02   | 0.01   | 0.01                         | 0.01   | 0.01   | 0.02   | 0                      | 0      | 50     | -      |
| November '20  | n. d.                        | 0.21   | 0.07   | 0.11   | 0.06                         | 0.16   | 0.07   | n. d.  | -                      | 23.8   | 0      | -      |
| December '20  | n. d.                        | 0.08   | 0.06   | 0.06   | 0.06                         | n. d.  | n. d.  | 0.07   | -                      | -      | -      | -      |
| January '21   | 0.01                         | 0.02   | 0.01   | 0.01   | 0.003                        | 0.004  | 0.006  | 0.003  | 73.1                   | 77.0   | 40     | 65.2   |
| February '21  | n. d.                        | 0.24   | 0.07   | 0.10   | n. d.                        | n. d.  | n. d.  | 0.07   | -                      | -      | -      | 30.3   |
| March '21     | n. d.                        | 0.04   | 0.03   | 0.01   | n. d.                        | 0.01   | n. d.  | n. d.  | -                      | 75     | -      | -      |

**Table S10.** Imidacloprid concentrations ( $\mu\text{g/L}$ ) and removal efficiencies (%) in influent and effluent in the four WWTPs analysed; n.d. is not detected.

| Months        | INFLUENT ( $\mu\text{g/L}$ ) |       |       |       | EFFLUENT ( $\mu\text{g/L}$ ) |       |       |       | Removal efficiency (%) |      |      |      |
|---------------|------------------------------|-------|-------|-------|------------------------------|-------|-------|-------|------------------------|------|------|------|
|               | WWTP                         | WWTP  | WWTP  | WWTP  | WWTP                         | WWTP  | WWTP  | WWTP  | WWTP                   | WWTP | WWTP | WWTP |
|               | 1                            | 2     | 3     | 4     | 1                            | 2     | 3     | 4     | 1                      | 2    | 3    | 4    |
| July '20      | n. d.                        | 0.04  | 0.06  | n. d. | n. d.                        | 0.05  | n. d. | n. d. | -                      | -    | -    | -    |
| August '20    | 0.46                         | 0.85  | 0.40  | 0.56  | 0.35                         | 0.33  | 0.38  | 0.33  | 23.9                   | 61.2 | 5    | 41.1 |
| September '20 | 0.53                         | 1.05  | 0.31  | 0.41  | 0.11                         | 0.49  | 0.11  | 0.24  | 79.2                   | 53.3 | 64.5 | 41.5 |
| October '20   | 3.23                         | 9.91  | 14.1  | 3.36  | 4.11                         | 7.80  | 4.56  | 3.27  | -                      | 21.3 | 67.7 | 2.7  |
| November '20  | n. d.                        | n. d. | n. d. | n. d. | n. d.                        | n. d. | n. d. | n. d. | -                      | -    | -    | -    |
| December '20  | n. d.                        | n. d. | n. d. | n. d. | n. d.                        | n. d. | n. d. | n. d. | -                      | -    | -    | -    |
| January '21   | n. d.                        | n. d. | n. d. | n. d. | 0.09                         | n. d. | 0.09  | n. d. | -                      | -    | -    | -    |
| February '21  | 0.13                         | n. d. | 0.13  | 0.26  | n. d.                        | n. d. | 0.06  | 0.05  | -                      | -    | 50.8 | 81.9 |
| March '21     | n. d.                        | 0.65  | 0.66  | 0.57  | 0.49                         | 0.48  | 0.53  | n. d. | -                      | 26.2 | 19.7 | -    |

**Table S11.**  $17\alpha$ -ethinylestradiol concentrations ( $\mu\text{g/L}$ ) and removal efficiencies (%) in influent and effluent in the four WWTPs analysed; n.d. is not detected.

| Months        | INFLUENT ( $\mu\text{g/L}$ ) |       |       |       | EFFLUENT ( $\mu\text{g/L}$ ) |       |       |       | Removal efficiency (%) |      |      |      |
|---------------|------------------------------|-------|-------|-------|------------------------------|-------|-------|-------|------------------------|------|------|------|
|               | WWTP                         | WWTP  | WWTP  | WWTP  | WWTP                         | WWTP  | WWTP  | WWTP  | WWTP                   | WWTP | WWTP | WWTP |
|               | 1                            | 2     | 3     | 4     | 1                            | 2     | 3     | 4     | 1                      | 2    | 3    | 4    |
| July '20      | 0.19                         | 0.21  | 0.02  | 0.10  | n. d.                        | n. d. | n. d. | n. d. | -                      | -    | -    | -    |
| August '20    | 0.26                         | 0.25  | 0.37  | 0.27  | n. d.                        | 0.11  | 0.12  | n. d. | -                      | 56   | 67.6 | -    |
| September '20 | 0.02                         | 0.01  | 0.01  | 0.02  | 0.003                        | 0.003 | 0.002 | 0.003 | 85                     | 70   | 80   | 85   |
| October '20   | n. d.                        | n. d. | n. d. | n. d. | n. d.                        | n. d. | n. d. | n. d. | -                      | -    | -    | -    |
| November '20  | 0.83                         | 1.04  | 0.1   | 0.25  | 0.09                         | n. d. | 0.09  | n. d. | 89.2                   | -    | 10   | -    |
| December '20  | 0.37                         | 0.26  | 0.09  | n. d. | n. d.                        | n. d. | n. d. | n. d. | -                      | -    | -    | -    |
| January '21   | 0.14                         | 0.18  | 0.02  | 0.06  | 0.001                        | n. d. | n. d. | n. d. | 99.3                   | -    | -    | -    |
| February '21  | n. d.                        | n. d. | n. d. | n. d. | n. d.                        | n. d. | n. d. | n. d. | -                      | -    | -    | -    |
| March '21     | n. d.                        | n. d. | n. d. | n. d. | n. d.                        | n. d. | n. d. | n. d. | -                      | -    | -    | -    |

**Table S12.** Biodegradation constant ( $k_i$ ) for ibuprofen, diclofenac and erythromycin in the four WWTPs analysed.

| Months        | $k_i$ Ibuprofen ( $h^{-1}$ ) |      |       |        | $k_i$ Diclofenac ( $h^{-1}$ ) |       |       |      | $k_i$ Erythromycin ( $h^{-1}$ ) |       |       |       |
|---------------|------------------------------|------|-------|--------|-------------------------------|-------|-------|------|---------------------------------|-------|-------|-------|
|               | WWTP                         | WWTP | WWTP  | WWTP   | WWTP                          | WWTP  | WWTP  | WWTP | WWTP                            | WWTP  | WWTP  | WWTP  |
|               | 1                            | 2    | 3     | 4      | 1                             | 2     | 3     | 4    | 1                               | 2     | 3     | 4     |
| July '20      | 2.94                         | 36   | 1.48  | 0.194  | 0.1077                        | -     | -     | -    | -                               | -     | -     | 0.066 |
| August '20    | 0.515                        | 41   | 2.68  | 0.97   | 0.0891                        | 0.69  | -     | -    | 0.141                           | -     | 0.272 | -     |
| September '20 | 0.1175                       | -    | 3.5   | 0.387  | -                             | -     | -     | -    | 0.096                           | 0.262 | 0.340 | 0.085 |
| October '20   | 7.7                          | 77   | 2.77  | 0.476  | -                             | 0.124 | 0.051 | -    | -                               | -     | -     | -     |
| November '20  | 0.0814                       | -    | 6.2   | 1.27   | -                             | -     | -     | -    | -                               | -     | 0.212 | -     |
| December '20  | 0.96                         | 69   | 13.5  | 0.1233 | -                             | -     | -     | -    | -                               | -     | -     | -     |
| January '21   | 0.8                          | 133  | 0.563 | 0.293  | -                             | -     | -     | -    | -                               | -     | -     | -     |
| February '21  | 3.27                         | 39   | 0.702 | 0.288  | -                             | -     | -     | -    | -                               | -     | -     | -     |
| March '21     | 1.08                         | 33.5 | 2.15  | 0.292  | -                             | -     | -     | -    | -                               | -     | -     | -     |

**Table S13.** Theoretical biodegradation constant ( $k_i$ ) for triclosan, imidacloprid and 17 $\alpha$ -ethinylestradiol in the four WWTPs analysed.

| Months        | $k_i$ Triclosan ( $h^{-1}$ ) |        |        |       | $k_i$ Imidacloprid ( $h^{-1}$ ) |        |        |        | $k_i$ 17 $\alpha$ -ethinylestradiol ( $h^{-1}$ ) |       |        |       |
|---------------|------------------------------|--------|--------|-------|---------------------------------|--------|--------|--------|--------------------------------------------------|-------|--------|-------|
|               | WWTP                         | WWTP   | WWTP   | WWTP  | WWTP                            | WWTP   | WWTP   | WWTP   | WWTP                                             | WWTP  | WWTP   | WWTP  |
|               | 1                            | 2      | 3      | 4     | 1                               | 2      | 3      | 4      | 1                                                | 2     | 3      | 4     |
| July '20      | -                            | 0.1250 | -      | -     | -                               | -      | -      | -      | -                                                | -     | -      | -     |
| August '20    | -                            | -      | -      | -     | 0.0078                          | 0.164  | 0.0015 | 0.0192 | -                                                | -     | 0.071  | -     |
| September '20 | -                            | -      | 0.0015 | -     | 0.085                           | 0.114  | 0.0655 | 0.0197 | 0.124                                            | 0.223 | 0.1420 | 0.162 |
| October '20   | -                            | -      | -      | -     | -                               | 0.0274 | 0.088  | 0.0005 | -                                                | -     | -      | -     |
| November '20  | -                            | -      | -      | -     | -                               | -      | -      | -      | 0.166                                            | -     | -      | -     |
| December '20  | -                            | -      | -      | -     | -                               | -      | -      | -      | -                                                | -     | -      | -     |
| January '21   | 0.0179                       | 0.225  | -      | 0.016 | -                               | -      | -      | -      | 3                                                | -     | -      | -     |
| February '21  | -                            | -      | -      | -     | -                               | -      | 0.03   | 0.067  | -                                                | -     | -      | -     |
| March '21     | -                            | 0.255  | -      | -     | -                               | 0.0372 | 0.0083 | -      | -                                                | -     | -      | -     |

**Table S14.** Biodegradation constant ( $k_{ib}$ ) obtained using Arrhenius equation for ibuprofen in the four WWTPs analysed.

| Months        | WWTP 1      |                       | WWTP 2      |                       | WWTP 3      |                       | WWTP 4      |                       |
|---------------|-------------|-----------------------|-------------|-----------------------|-------------|-----------------------|-------------|-----------------------|
|               | Daily T (K) | $k_{ib}$ ( $h^{-1}$ ) | Daily T (K) | $k_{ib}$ ( $h^{-1}$ ) | Daily T (K) | $k_{ib}$ ( $h^{-1}$ ) | Daily T (K) | $k_{ib}$ ( $h^{-1}$ ) |
| July '20      | 297.95      | 1.32                  | 298.75      | 1.36                  | 301.05      | 1.48                  | 297.75      | 1.31                  |
| August '20    | 297.45      | 1.30                  | 299.15      | 1.38                  | 301.75      | 1.52                  | 297.45      | 1.30                  |
| September '20 | 293.05      | 1.10                  | 294.25      | 1.15                  | 297.55      | 1.30                  | 293.05      | 1.10                  |
| October '20   | 288.85      | 0.93                  | 289.35      | 0.95                  | 292.15      | 1.06                  | 288.85      | 0.93                  |
| November '20  | 282.85      | 0.73                  | 286.05      | 0.84                  | 289.35      | 0.95                  | 282.85      | 0.73                  |
| December '20  | 280.05      | 0.65                  | 282.75      | 0.73                  | 285.15      | 0.81                  | 280.05      | 0.65                  |
| January '21   | 279.25      | 0.63                  | 281.45      | 0.69                  | 284.05      | 0.77                  | 279.25      | 0.63                  |
| February '21  | 280.25      | 0.66                  | 284.55      | 0.79                  | 287.25      | 0.88                  | 280.25      | 0.66                  |
| March '21     | 292.95      | 1.10                  | 284.15      | 0.77                  | 286.95      | 0.87                  | 282.95      | 0.74                  |

**Table S15.** Biodegradation constant ( $k_{di}$ ) obtained using Arrhenius equation for diclofenac in the four WWTPs analysed.

|               | WWTP 1      |                             | WWTP 2      |                             | WWTP 3      |                             | WWTP 4      |                             |
|---------------|-------------|-----------------------------|-------------|-----------------------------|-------------|-----------------------------|-------------|-----------------------------|
| Months        | Daily T (K) | $k_{di}$ (h <sup>-1</sup> ) | Daily T (K) | $k_{di}$ (h <sup>-1</sup> ) | Daily T (K) | $k_{di}$ (h <sup>-1</sup> ) | Daily T (K) | $k_{di}$ (h <sup>-1</sup> ) |
| July '20      | 297.95      | 0.18                        | 298.75      | 0.20                        | 301.05      | 0.26                        | 297.75      | 0.18                        |
| August '20    | 297.45      | 0.17                        | 299.15      | 0.21                        | 301.75      | 0.28                        | 297.45      | 0.17                        |
| September '20 | 293.05      | 0.10                        | 294.25      | 0.12                        | 297.55      | 0.17                        | 293.05      | 0.10                        |
| October '20   | 288.85      | 0.06                        | 289.35      | 0.07                        | 292.15      | 0.09                        | 288.85      | 0.06                        |
| November '20  | 282.85      | 0.03                        | 286.05      | 0.05                        | 289.35      | 0.07                        | 282.85      | 0.03                        |
| December '20  | 280.05      | 0.02                        | 282.75      | 0.03                        | 285.15      | 0.04                        | 280.05      | 0.02                        |
| January '21   | 279.25      | 0.02                        | 281.45      | 0.03                        | 284.05      | 0.04                        | 279.25      | 0.02                        |
| February '21  | 280.25      | 0.02                        | 284.55      | 0.04                        | 287.25      | 0.05                        | 280.25      | 0.02                        |
| March '21     | 292.95      | 0.10                        | 284.15      | 0.04                        | 286.95      | 0.05                        | 282.95      | 0.03                        |

**Table S16.** Biodegradation constant ( $k_{er}$ ) obtained using Arrhenius equation for erythromycin in the four WWTPs analysed.

|               | WWTP 1      |                             | WWTP 2      |                             | WWTP 3      |                             | WWTP 4      |                             |
|---------------|-------------|-----------------------------|-------------|-----------------------------|-------------|-----------------------------|-------------|-----------------------------|
| Months        | Daily T (K) | $k_{er}$ (h <sup>-1</sup> ) | Daily T (K) | $k_{er}$ (h <sup>-1</sup> ) | Daily T (K) | $k_{er}$ (h <sup>-1</sup> ) | Daily T (K) | $k_{er}$ (h <sup>-1</sup> ) |
| July '20      | 297.95      | 0.17                        | 298.75      | 0.20                        | 301.05      | 0.26                        | 297.75      | 0.18                        |
| August '20    | 297.45      | 0.17                        | 299.15      | 0.21                        | 301.75      | 0.28                        | 297.45      | 0.17                        |
| September '20 | 293.05      | 0.15                        | 294.25      | 0.12                        | 297.55      | 0.17                        | 293.05      | 0.10                        |
| October '20   | 288.85      | 0.13                        | 289.35      | 0.07                        | 292.15      | 0.09                        | 288.85      | 0.06                        |
| November '20  | 282.85      | 0.11                        | 286.05      | 0.05                        | 289.35      | 0.07                        | 282.85      | 0.03                        |
| December '20  | 280.05      | 0.10                        | 282.75      | 0.03                        | 285.15      | 0.04                        | 280.05      | 0.02                        |
| January '21   | 279.25      | 0.10                        | 281.45      | 0.03                        | 284.05      | 0.04                        | 279.25      | 0.02                        |
| February '21  | 280.25      | 0.10                        | 284.55      | 0.04                        | 287.25      | 0.05                        | 280.25      | 0.02                        |
| March '21     | 292.95      | 0.15                        | 284.15      | 0.04                        | 286.95      | 0.05                        | 282.95      | 0.03                        |
